# Supplementary material for: Candidate tumor-specific CD8+ T cell subsets identified in the malignant pleural effusion of advanced lung cancer patients by single-cell analysis
Source: PubMed Central journal article supplement — Oncoimmunology. 2024 Jun 28;13(1):2371556. doi: 10.1080/2162402X.2024.2371556 (PMC11216099; doi:10.1080/2162402x.2024.2371556), 2024-06-28
Supplement: KONI_A_2371556_SM4828.pdf [file KONI_A_2371556_SM4828.pdf]

# Supplementary Fig. S1

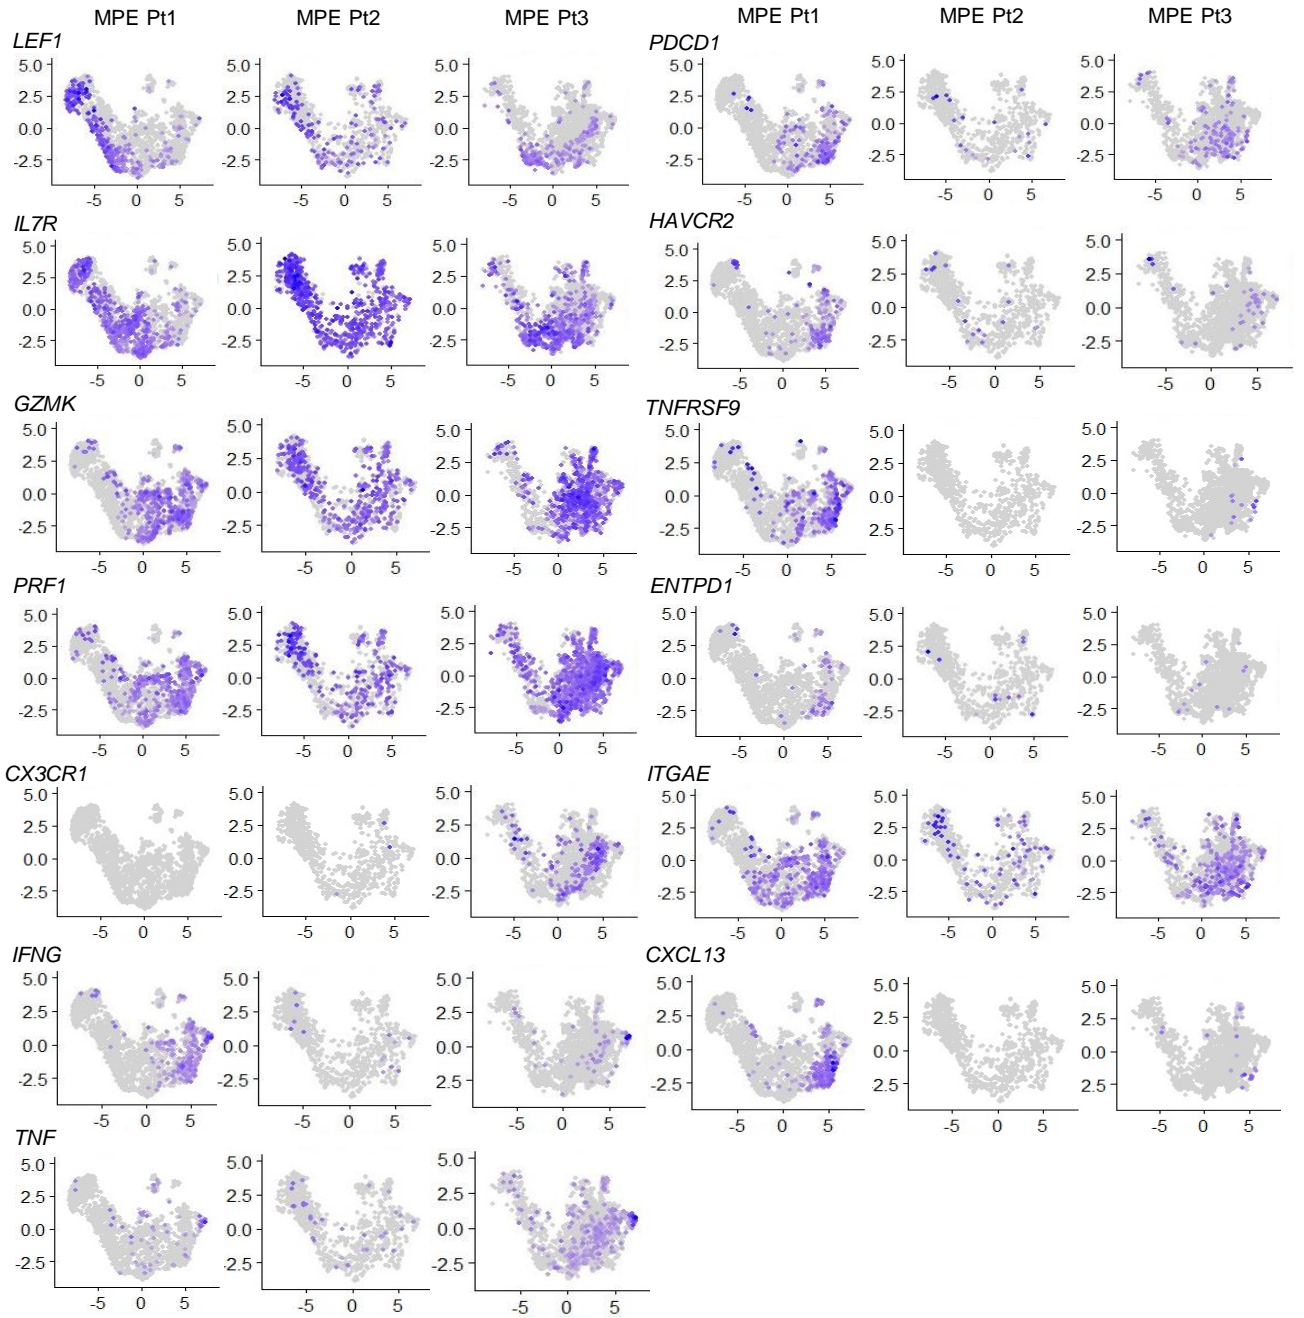

## Supplementary Fig. S1. UMAPs of the distribution of representative marker genes.

Gene expression of *LEF1*, *IL7R*, *GZMK*, *PRF1*, *CX3CR1*, *IFNG*, *TNF*, *PDCD1*, *HAVCR2*, *TNFRSF9*, *ENTPD1*, *ITGAE*, and *CXCL13* detected in hierarchical clustering (Figure 1E) in each patient.

## Supplementary Fig. S2

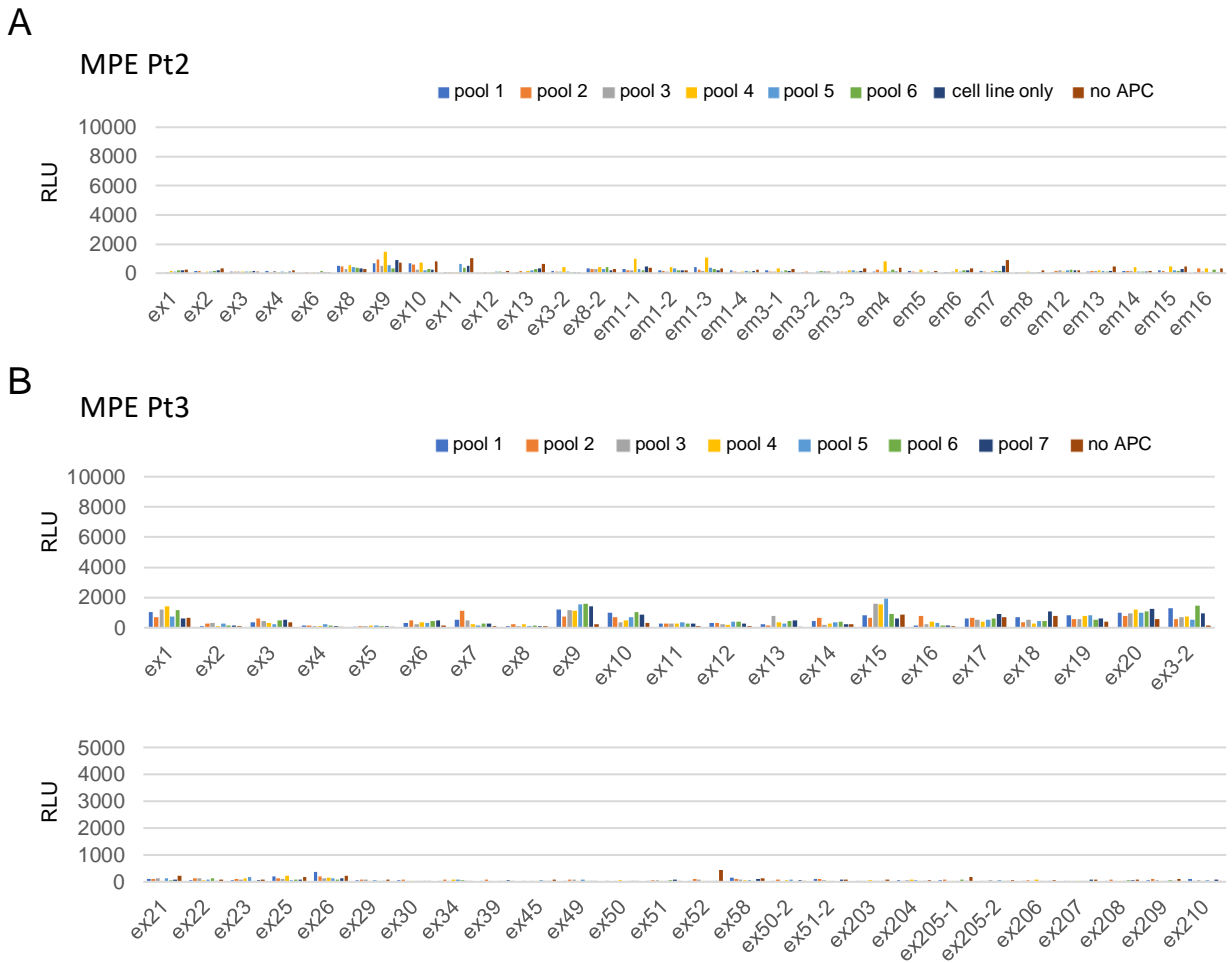

### Supplementary Fig. S2. Screening of tumor neoantigens recognized by TCR-transduced CD8-J2 cells in MPE Pt2 and MPE Pt3.

**A**, The specificity of 30 TCRs against 47 predicted neoantigen peptides was tested for screening in MPE Pt2 (Supplementary Table S2 and S5). All TCR clonotypes in clusters C4-C7 were selected. TCR's TAP fragment/luciferase-transduced CD8-J2 (TCR's TAP/luc-CD8-J2) cells were cocultured with autologous B-APC or tumor cells with pooled antigenic peptides (7-9 peptides/pool). Activation of TCR signaling was assessed by luciferase reporter assay driven by NFAT-response element. **B**, 47 TCRs from the exhausted cluster C5 but overlapped with many other clusters like C4 having a T cell clonotype ( $n = 283$ ) with high clonality were tested against 38 predicted neoantigen peptides in MPE Pt3 (Supplementary Table S3 and S6).

# Supplementary Fig. S3

**A**

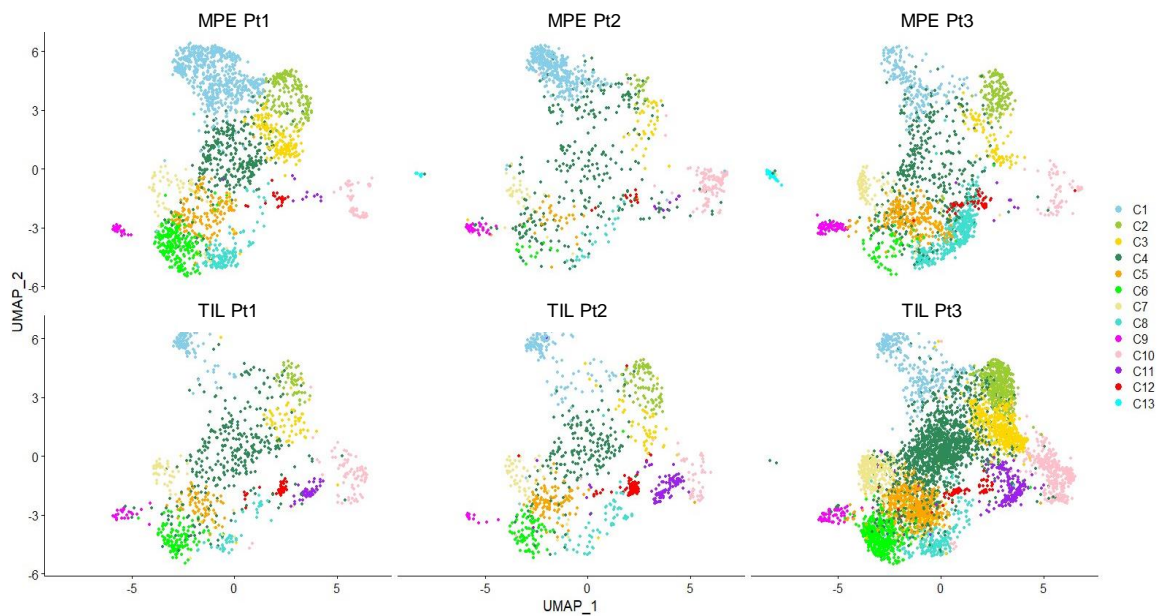

**B**

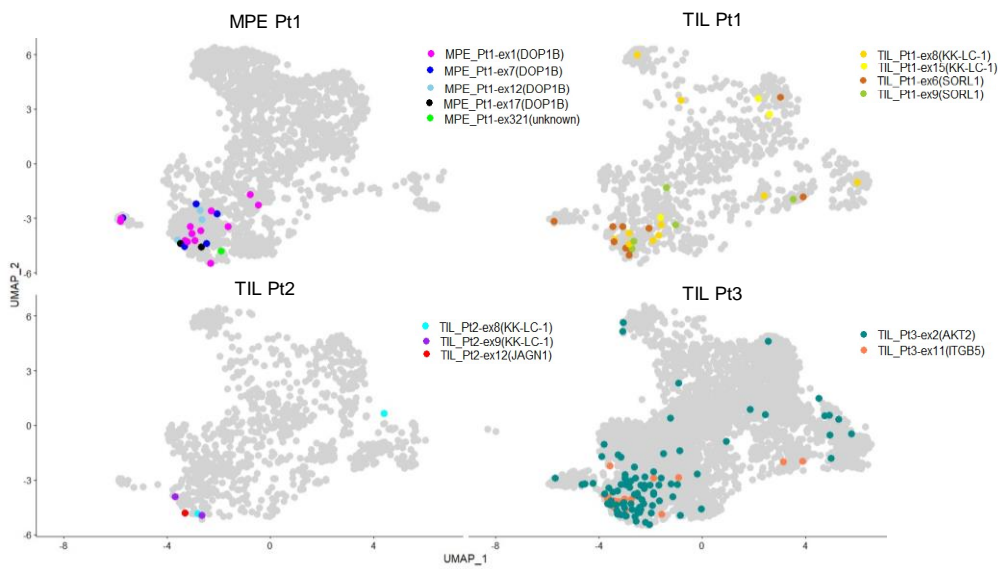

**Supplementary Fig. S3. Combined analyses of tumor-specific T cells from both MPE and TILs.**

**A.** The uniform manifold approximation and projection (UMAP) of the expression profiles of single CD8<sup>+</sup> T cells in each patient (3 MPE and 3 TIL) after combination (Fig. 4A). **B.** Tumor-specific T cells in MPE (MPE Pt1) and TILs (TIL Pt1, TIL Pt2, and TIL Pt3) are projected onto UMAPs. The number of T cells in the 10 clusters of each patient.

# Supplementary Fig. S4

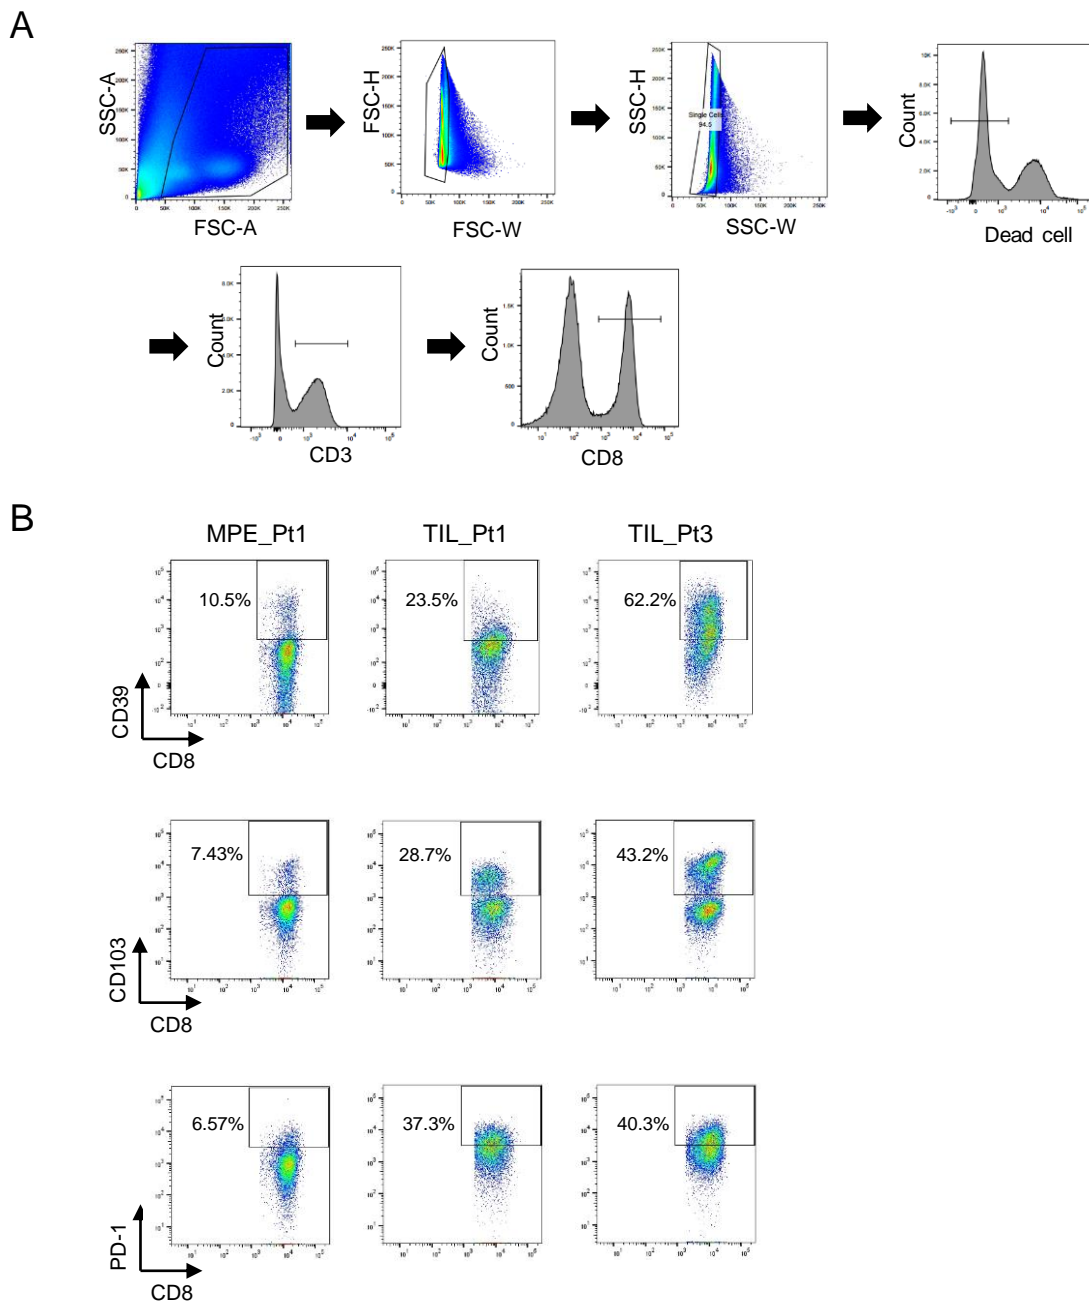

## Supplementary Fig. S4. Flow cytometry analysis.

The gating strategy is shown including initial gates (FSC singlet, SSC singlet and live cells) followed by CD3<sup>+</sup> and CD8<sup>+</sup> cells (A). CD8<sup>+</sup> T cells were further gated by the expression of surface markers CD39, CD103, and PD-1 (antibodies used in this analysis are shown in **Supplementary Table S1**) in MPE (MPE\_Pt1) and TILs (TIL\_Pt1 and TIL\_Pt3) (B).

# Supplementary Fig. S5

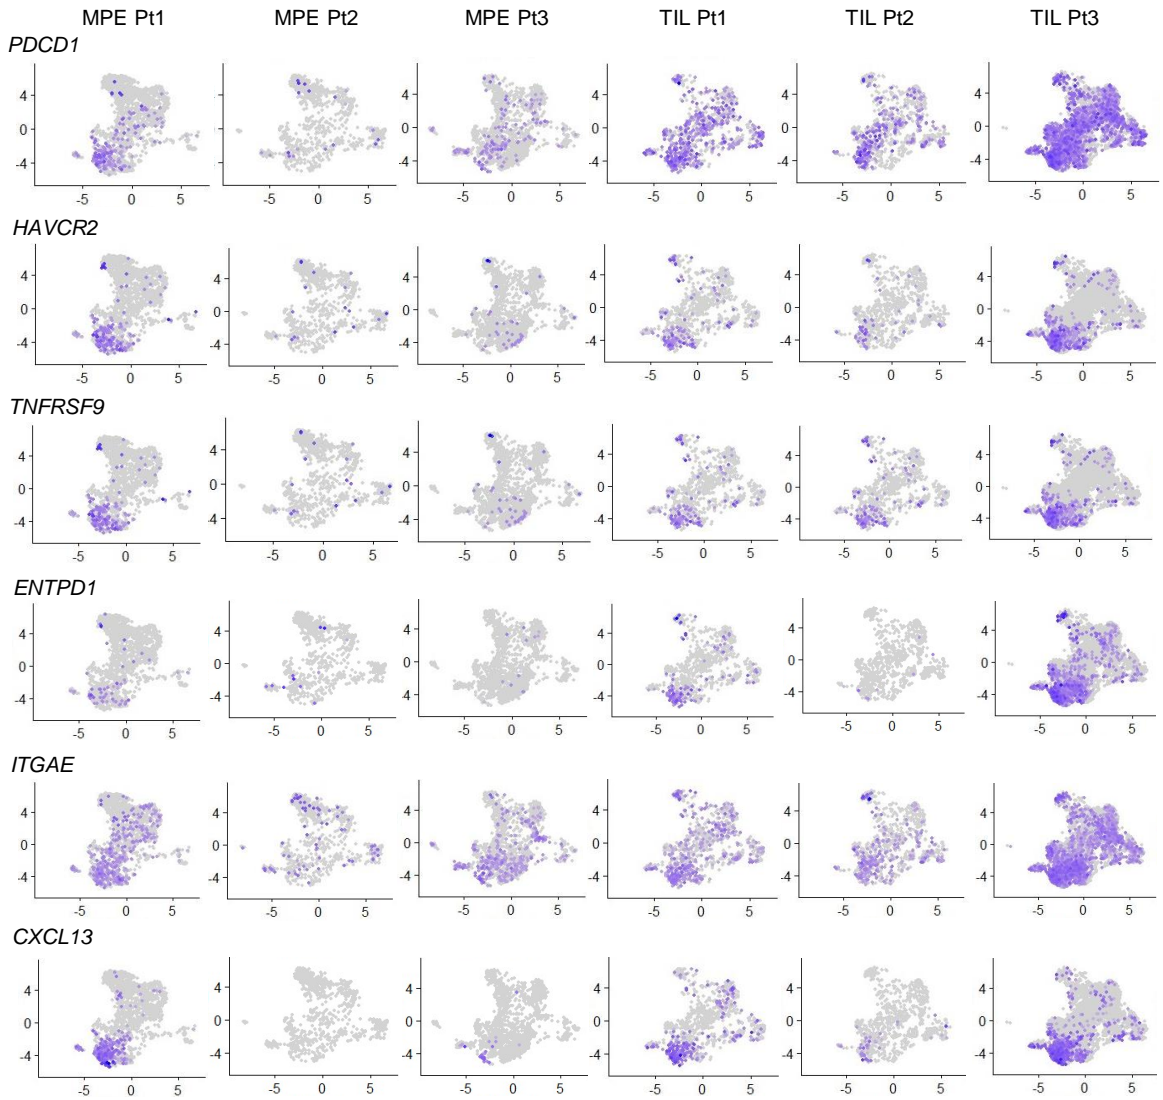

**Supplementary Fig. S5. UMAPs of the distribution of representative marker genes.**  
Gene expression of *PDCD1*, *HAVCR2*, *TNFRSF9*, *ENTPD1*, *ITGAE*, and *CXCL13* in six patient.



# Supplementary Fig. S6

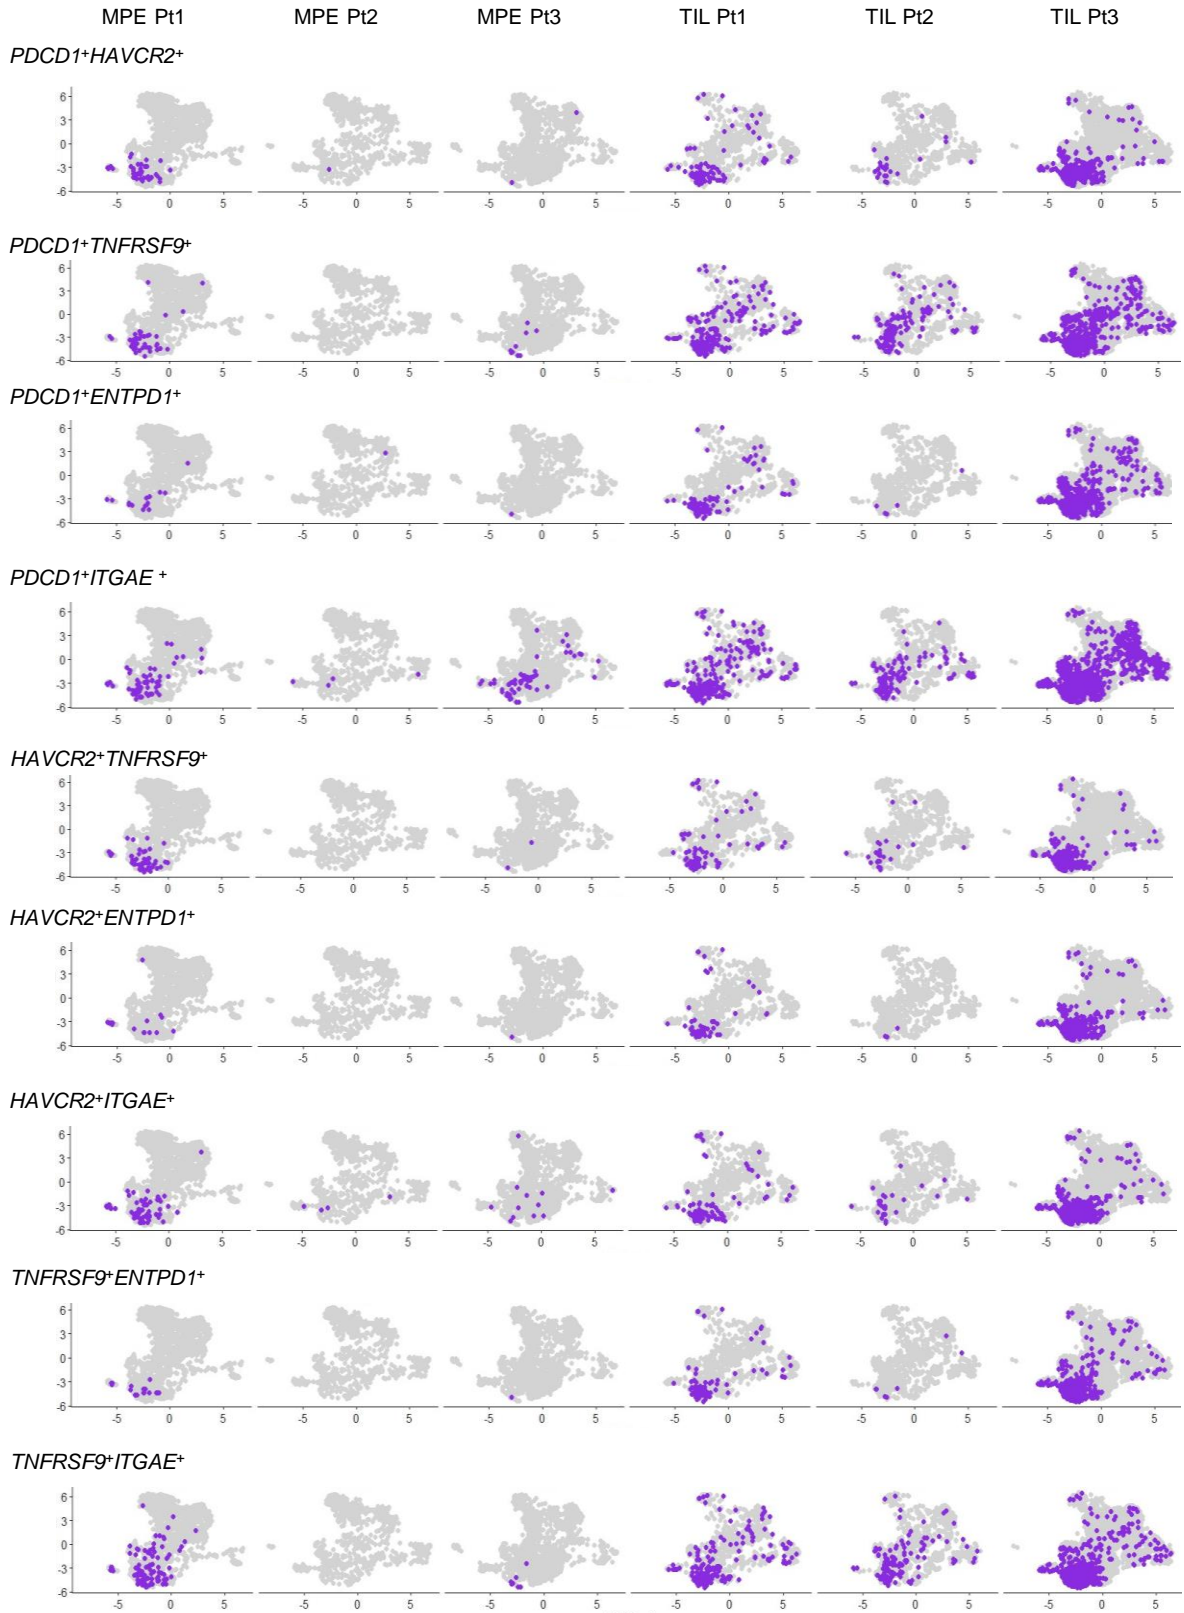

## Supplementary Fig. S6 (continued)

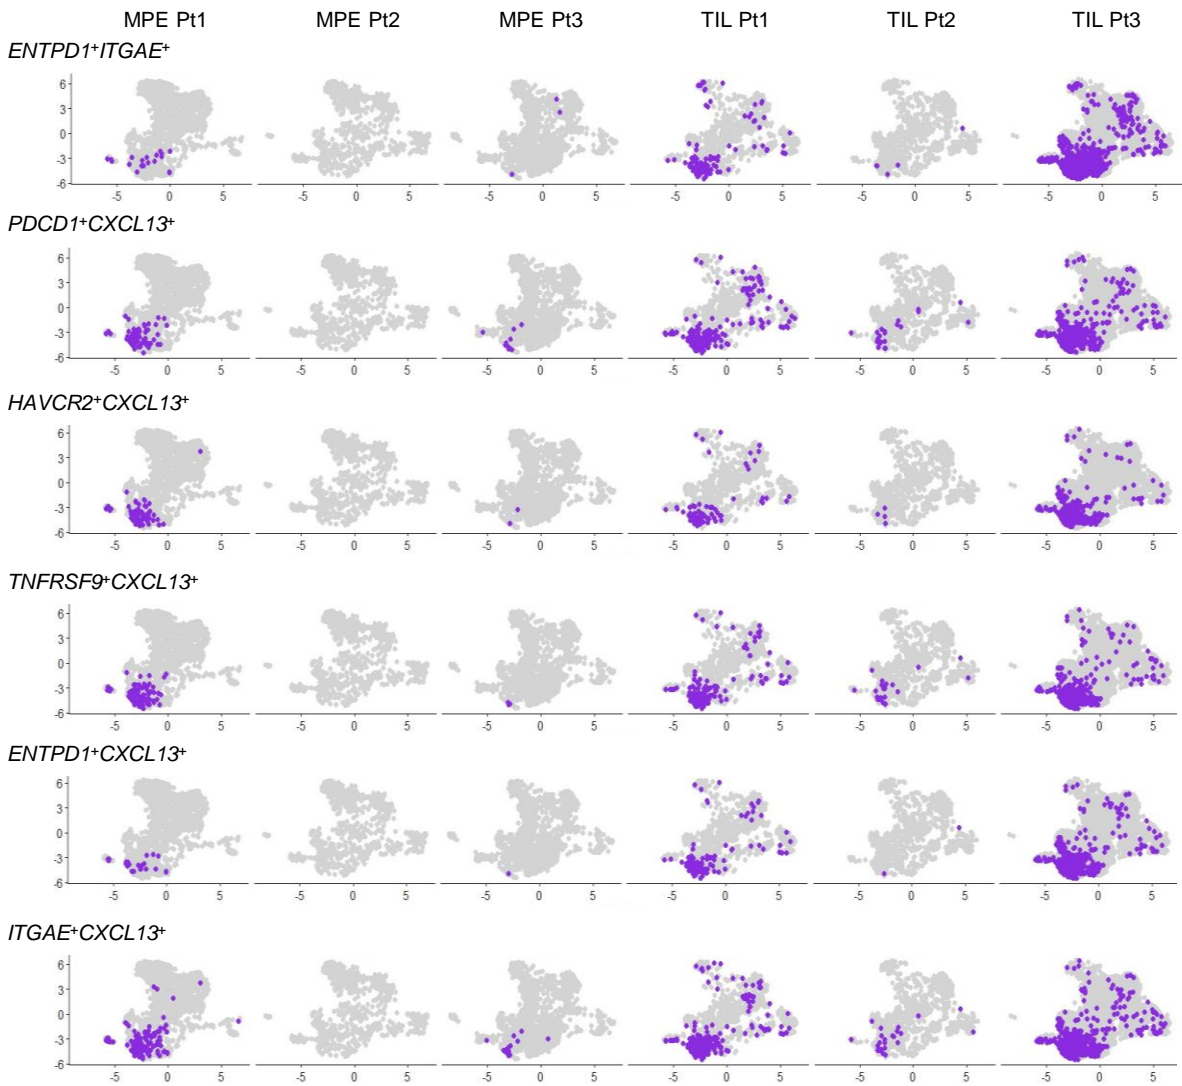

### Supplementary Fig. S6. UMAPs of the distribution of representative marker genes.

Gene expression of the combinations of *PDCD1*, *HAVCR2*, *TNFRSF9*, *ENTPD1*, *ITGAE*, and *CXCL13* in six patient. RNA expression, >0.5 (both genes)

# Supplementary Fig. S7

A

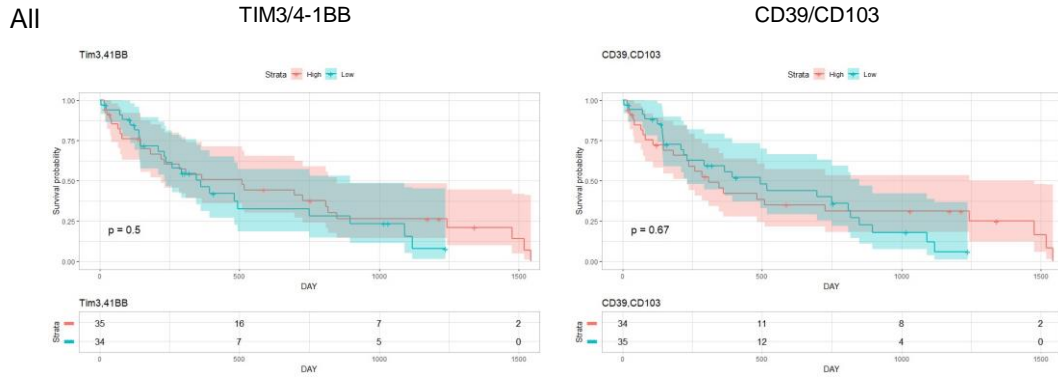

B

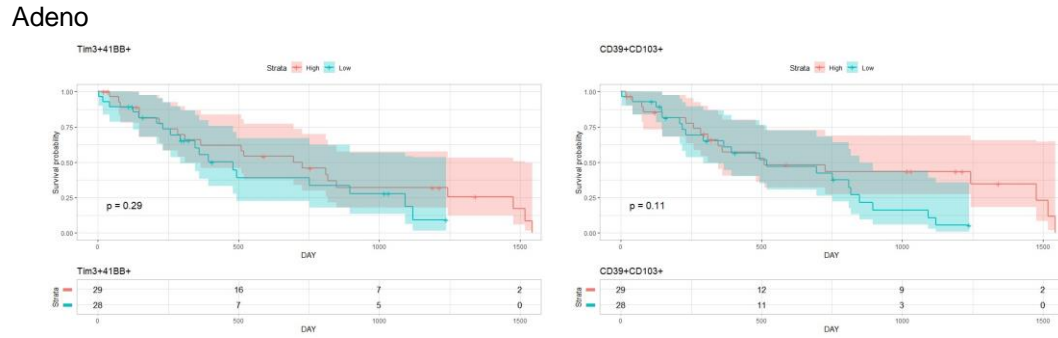

## Supplementary Fig. S7. Survival analysis based on the expression of exhausted T cell-related markers.

Kaplan-Meier survival curve dividing patients into two groups by the median values of the expression TIM3/4-1BB and CD39/CD103 in all patients ( $n = 69$ ) (A) and adenocarcinoma patients ( $n = 57$ ) (B).



# Supplementary Fig. S8

A

All

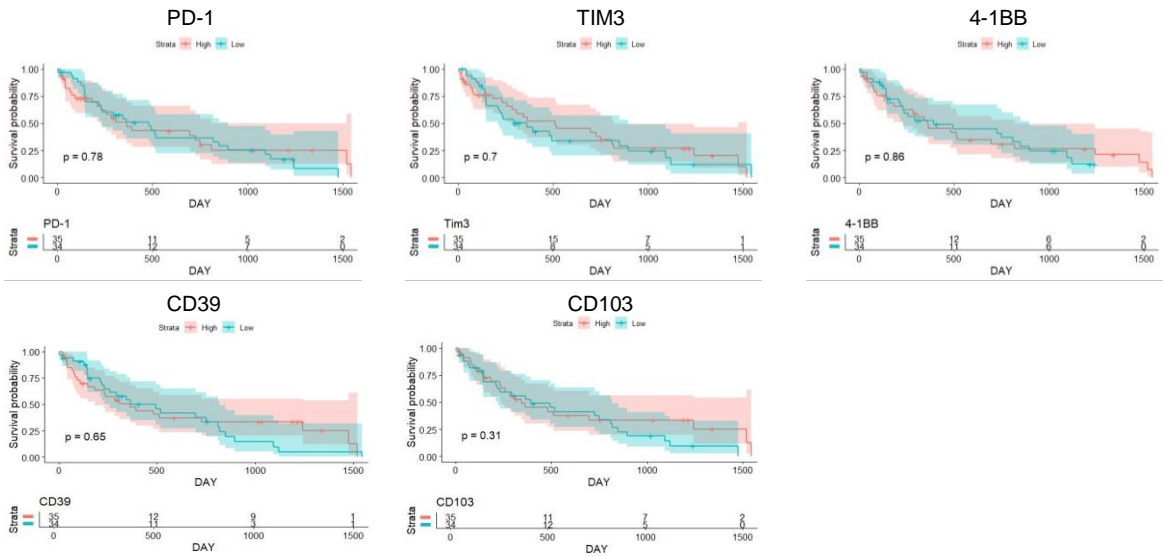

B

Adeno

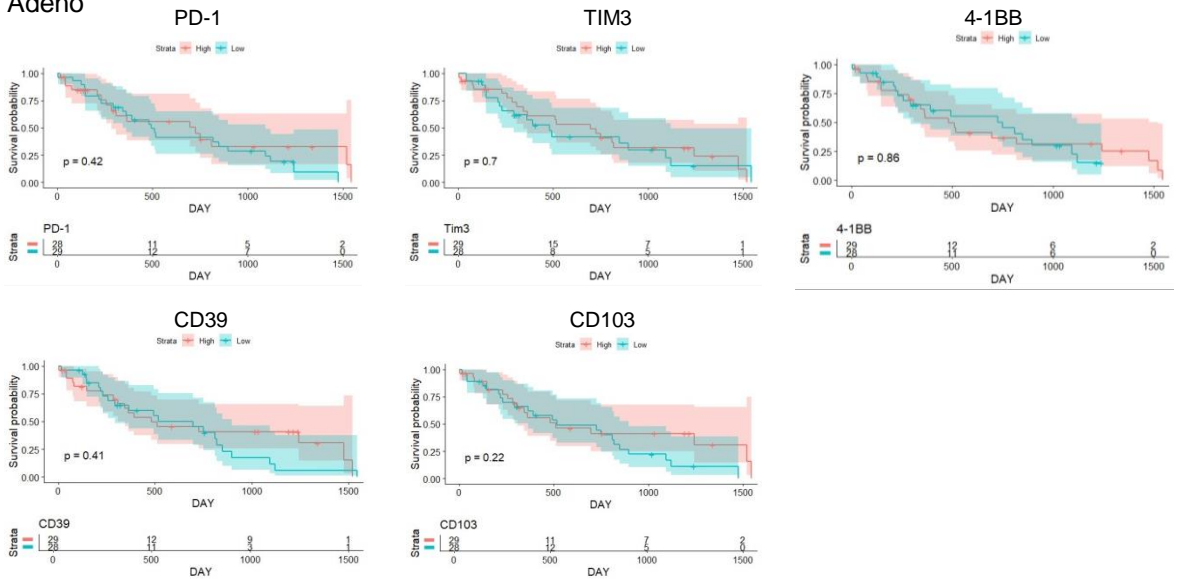

## Supplementary Fig. S8. Survival analysis based on the expression of exhausted T cell-related markers.

Kaplan-Meier survival curve dividing patients into two groups by the median values of the expression PD-1, 4-1BB, TIM3, CD39, CD103, and CXCL13 in all patients ( $n = 69$ ) (A) and adenocarcinoma patients ( $n = 57$ ) (B).
